# Supplementary material for: Diurnal rhythm in chimeric antigen receptor T cell effectiveness in an observational study of 715 patients
Source: JCI journal article supplement (doi:10.1172/jci.insight.201159), 2025-12-18
Supplement: sd1 [file 1]

## SUPPLEMENT

### Diurnal Rhythm in Chimeric Antigen Receptor T-Cell Effectiveness in an Observational Study of 715

#### Patients

Patrick G Lyons, MD, MSc<sup>1,2</sup>, Emily Gill<sup>3</sup>, Prisha Kumar<sup>3</sup>, Melissa Beasley<sup>3</sup>, Brenna Park-Egan, MS<sup>1</sup>, Zulfiqar A Lokhandwala<sup>1</sup>, Katie M Lebold, MD, PhD<sup>1</sup>, Brandon Hayes-Lattin, MD<sup>2</sup>, Catherine L Hough, MD, MSc<sup>1</sup>, Nathan Singh, MD, PhD<sup>4,5</sup>, Guy Hazan, MD, PhD<sup>6,7</sup>, Hiram Mok, MD<sup>3</sup>, Janice M Huss, PhD<sup>3</sup>, Colleen A McEvoy, MD<sup>3\*</sup>, and Jeffrey Haspel, MD, PhD<sup>3\*</sup>

<sup>1</sup>Division of Pulmonary, Allergy, and Critical Care Medicine, Oregon Health & Science University, Portland, OR, USA

<sup>2</sup>Knight Cancer Institute, Oregon Health & Science University, Portland, OR, USA

<sup>3</sup>Division of Pulmonary and Critical Care Medicine, Washington University School of Medicine, St. Louis, MO, USA

<sup>4</sup>Division of Oncology, Section of Cellular Therapy, Washington University School of Medicine, St. Louis, MO, USA

<sup>5</sup>Center for Gene and Cellular Immunotherapy, Washington University School of Medicine, St. Louis, MO, USA

<sup>6</sup>Faculty of Health Sciences, Ben Gurion University, Beer Sheva, Israel

<sup>7</sup>Pediatric Pulmonary Unit, Saban Children Hospital, Soroka University Medical Center, Beer Sheva, Israel

\*Corresponding author contact information: Jeffrey Haspel, Division of Pulmonary and Critical Care Medicine, Department of Internal Medicine, Washington University School of Medicine, Campus Box 8052, 660 South Euclid Avenue, St. Louis, MO, 63110, USA. Email: [jhaspel@wustl.edu](mailto:jhaspel@wustl.edu)

**Conflict of interest statement:** NS holds equity in Phoreus Bio, is a co-founder of Defiance Therapeutics, and has patents related to engineered T cell therapies, some of which have been licensed to Novartis and all of which are managed by the University of Pennsylvania or Washington University. All other authors declare no competing interests.

## Supplemental Figure 1

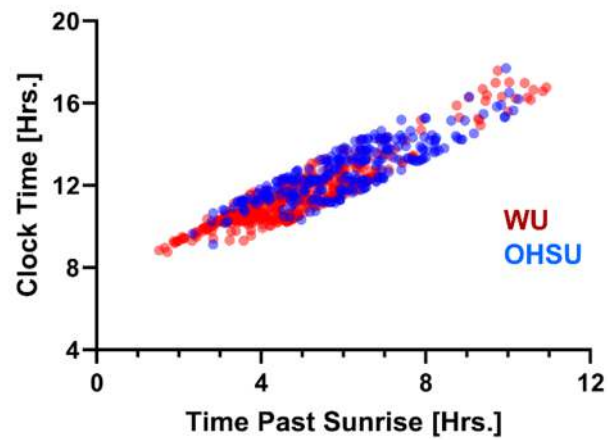

**Supplemental Figure 1.** Comparison of CAR T-Cell infusion times plotted as local “clock” time versus hours past sunrise (n=715). Red symbols, patients from WU; blue symbols, patients from OHSU. Note that any given clock time can vary by up to 2 hours relative to sunrise, depending on the season. Also note that the WU cohort encompasses a broader range of infusion times.

Supplemental Figure 2

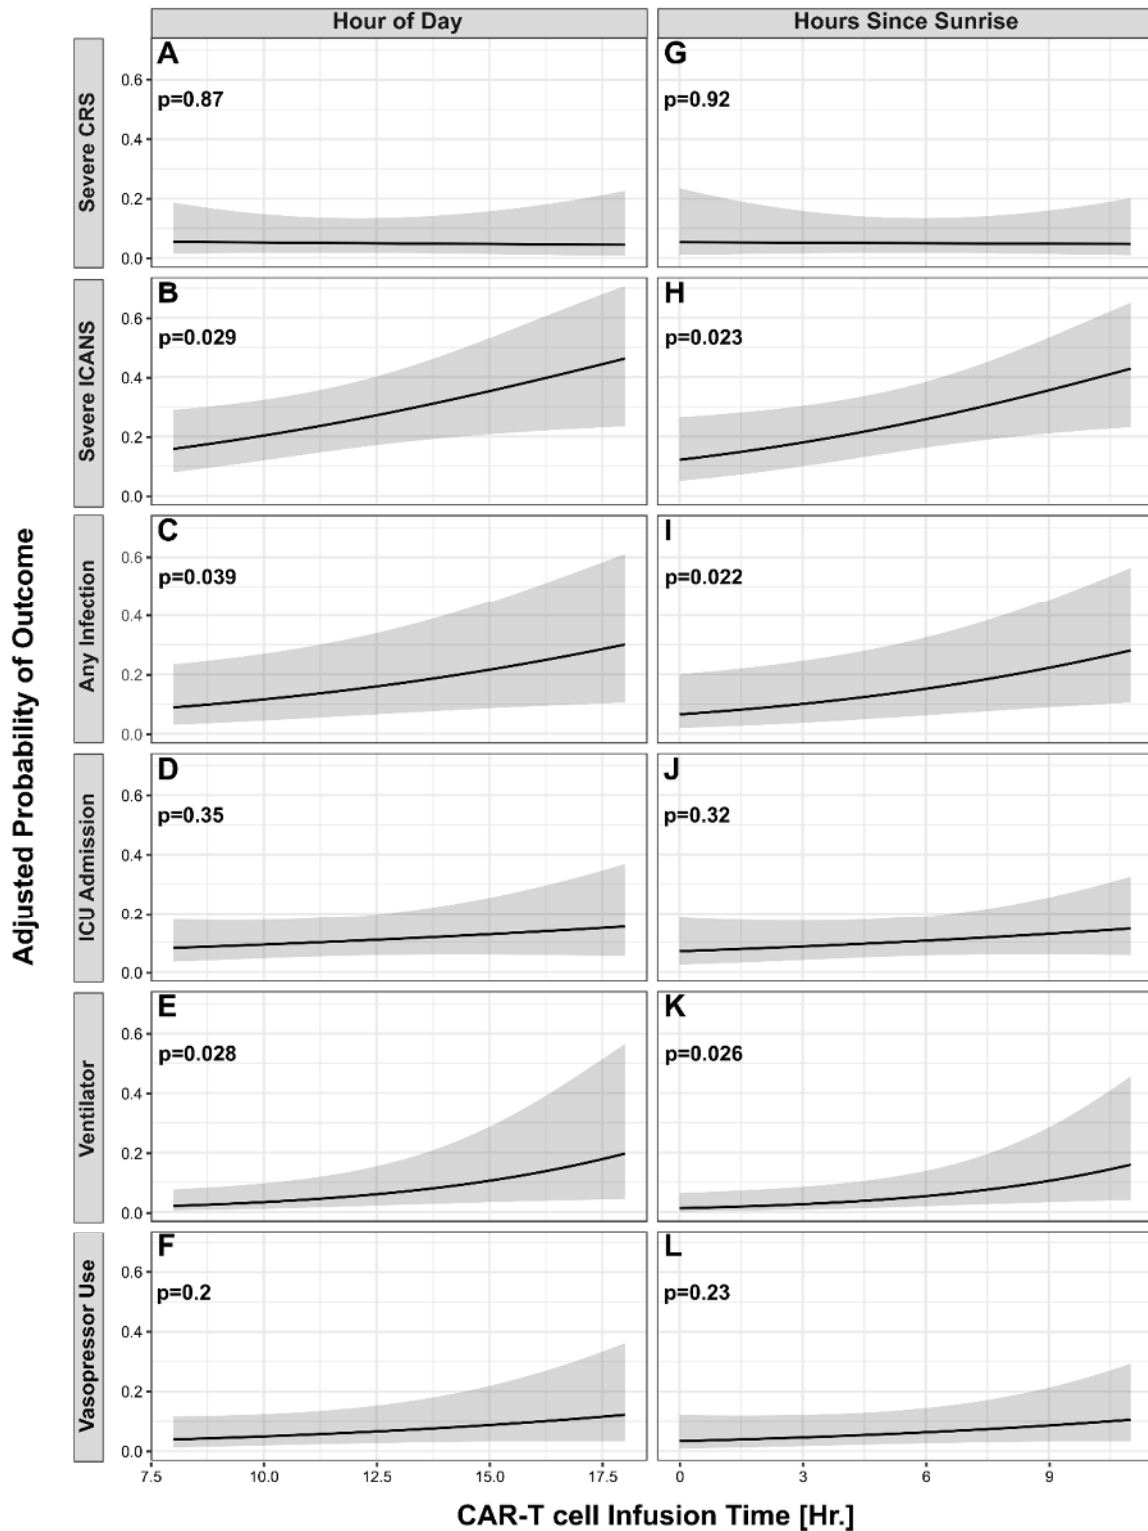

**Supplemental Figure 2. Association between CAR-T cell infusion times and complications.** The panels depict multivariate logistic regression analyses correlating the probability of selected complications with CAR-T infusion time, expressed as hours of the clock (A-F, left column) or hours since local sunrise (G-L, right column). Each row represents a different complication as labeled to the right. Shaded areas represent 95%-CIs. Wald test calculated p-values are depicted. p-values are derived from approximate Wald tests based on the estimated covariance of the spline coefficients.

### Supplemental Figure 3

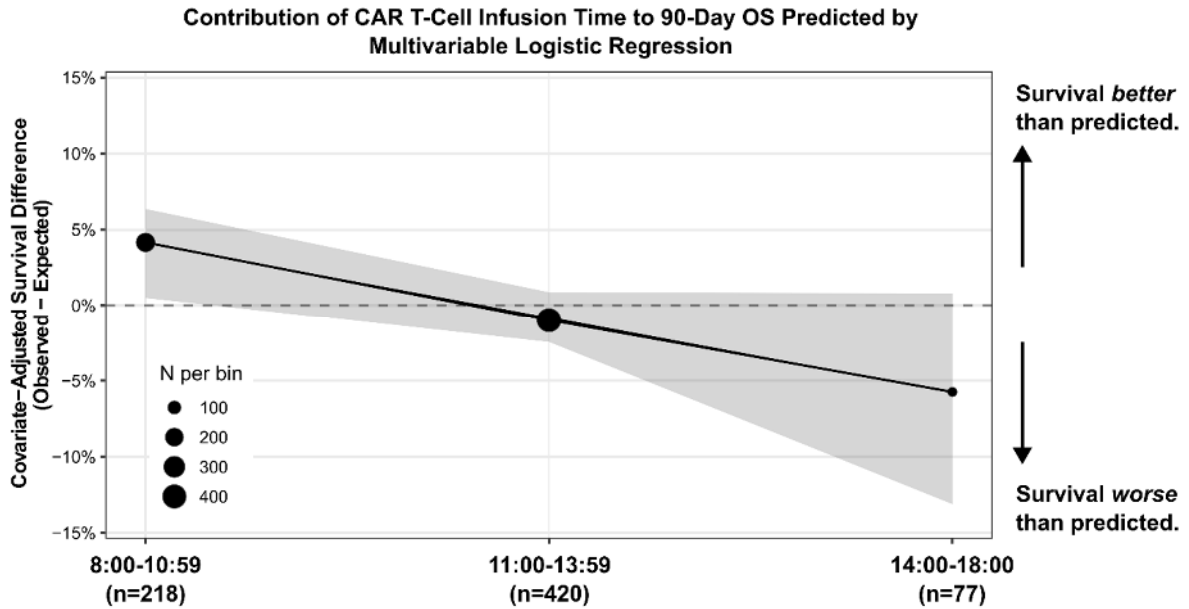

**Supplemental Figure 3. Including time of day significantly improves logistic regression modeling of post-CAR T-cell survival.** The plot depicts a covariate adjusted empirical risk as a function of CAR T-cell infusion time. It was generated by fitting our multivariable regression model as described in Methods but excluding infusion time. Patients were then grouped into 3 bins to generate via this model an “expected” 90-day OS. This was then subtracted from the observed 90-day OS to yield the covariate-adjusted survival difference depicted on the y-axis. Shaded areas represent 95%-CIs. Note that 90-day OS in the morning infusion bin “outperforms” the model by approximately 5% while late day infusions underperform by roughly 5%.

## Supplemental Figure 4

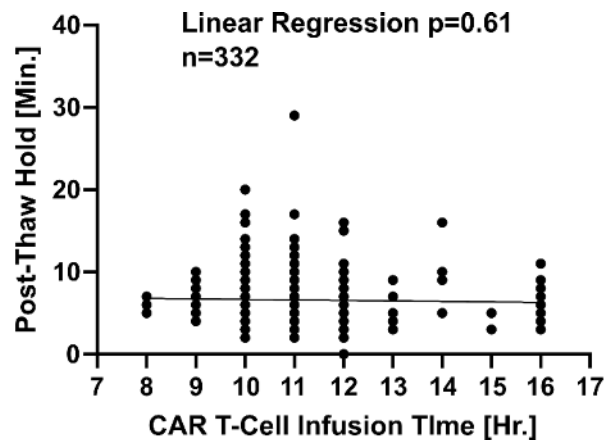

**Supplemental Figure 4. No correlation between CAR-T cell Infusion time and the product post-thaw hold duration.** Data were abstracted from WU EHR records where there was a timestamp indicating when the CAR-T cells began thawing (n=332, 86.5% of the total cohort). "Post-thaw hold" duration is defined as the interval between the start of thawing the CAR-T cells and the beginning of product administration to the patient. Significance was determined via linear regression, with the null hypothesis being that the slope of the regression line is zero (i.e. no relationship between infusion time and post-thaw hold duration).

## Supplemental Figure 5

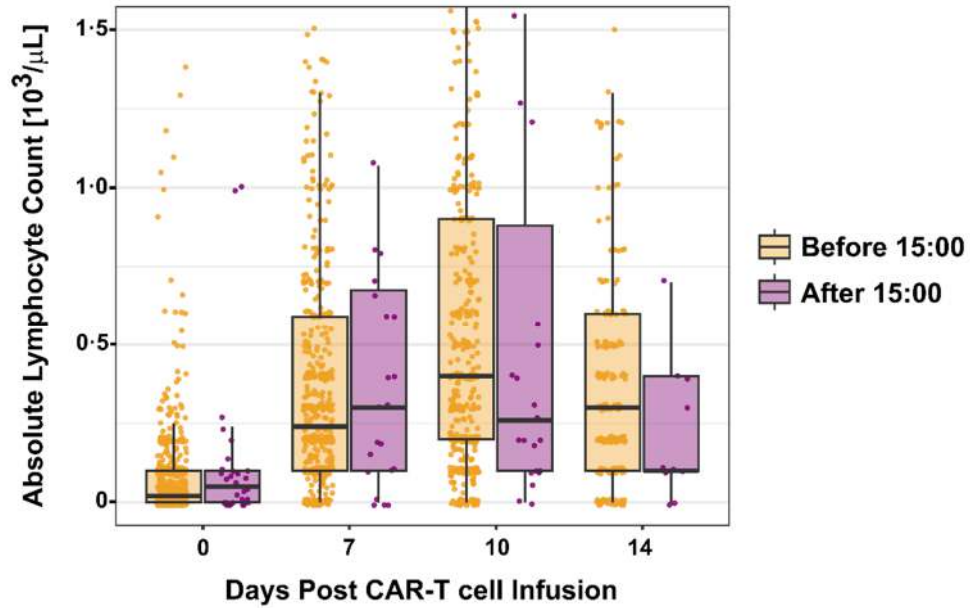

**Supplemental Figure 5. Absolute lymphocyte count recovery did not substantially differ by CAR-T cell infusion time of day.** The x-axis represents time, in days, since CAR T-cell infusion. The y-axis represents the absolute lymphocyte count. Orange indicates patients infused before 15:00 (n=384-673) and purple indicates those infused at or after 15:00 (n=17-30). Each value is one scattered point. Boxes represent the interquartile range (IQR) with the horizontal line indicating the median; whiskers extend to  $1.5 \times$  IQR.

## Supplemental Figure 6

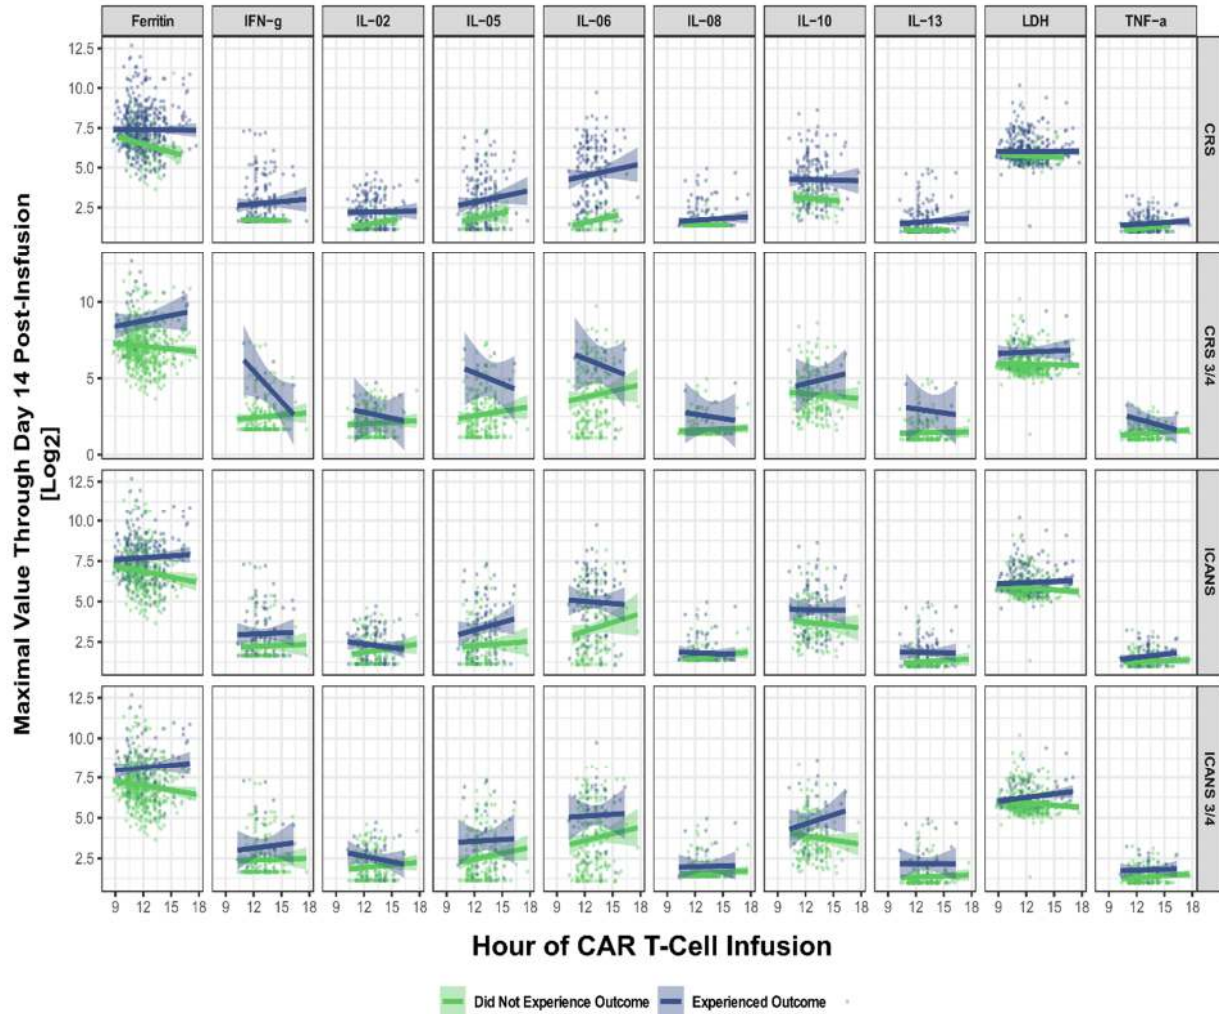

**Supplemental Figure 6. Maximal laboratory values as a function of CAR-T Infusion time.** Columns depict scatter plots of the maximal serologic levels of the indicated test out to day 14 post-CAR-T cell infusion (n=167-661). The data are expressed in log units (y axis) versus CAR T-cell infusion time (x-axis). Each row groups the data based on the occurrence of a specific complication indicated to the right of the panel. Trends lines  $\pm$  95%-CI are depicted within each panel. Blue lines represent the temporal trend amongst patients who experienced the specified outcome (e.g. CRS); green lines represent the trend for patients who did not experience the outcome.

## Supplemental Figure 7

### Subgroup Analysis- Severe (Grade 3/4) ICANS

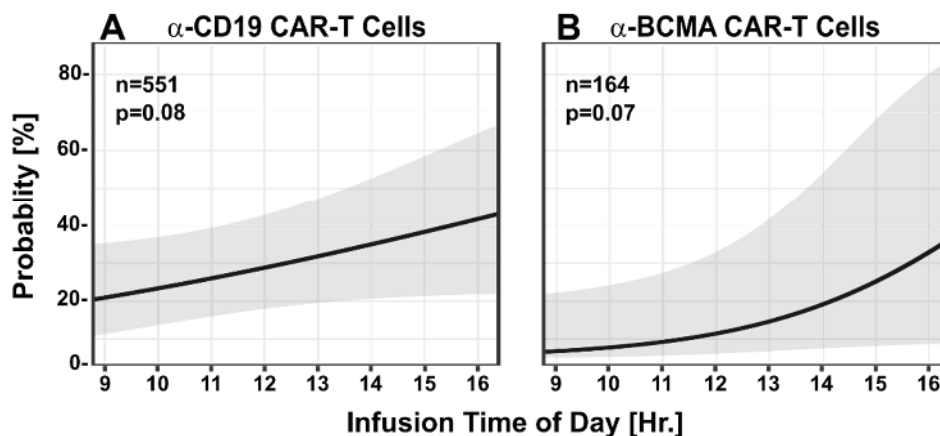

**Supplemental Figure 7. Adjusted risk of severe ICANS binned by CAR target.** Panels (A) and (B) depicted marginal effects plots from our multivariable logistic regression model for patients receiving CD19 (n=551) versus BCMA-directed products (n=164), respectively. Wald p-values for trend are depicted in each graph. Note that CD19-directed CAR T-cells are given for indications of lymphoma or leukemia, while BCMA-directed products are indicated for multiple myeloma.

**Supplemental Table 1. Characteristics and outcomes of patients receiving CAR T-cell infusions at WU and OHSU.**

| <b>Patient Characteristics</b>                   | <b>WU N = 384</b>    | <b>OHSU N = 331</b>  | <b>p Value</b> |
|--------------------------------------------------|----------------------|----------------------|----------------|
| Age, years, median (IQR)                         | 66 (58, 73)          | 65 (56, 72)          | 0.045          |
| Female, n (%)                                    | 114 (29.7%)          | 119 (36.0%)          | 0.075          |
| Non-Hispanic Caucasian, n (%)                    | 334 (87.0%)          | 256 (77.3%)          | <0.001         |
| Malignancy, n (%)                                |                      |                      | <0.001         |
| DLBCL                                            | 249 (64.8%)          | 184 (55.6%)          |                |
| Other Lymphomas                                  | 33 (8.6%)            | 48 (14.5%)           |                |
| Leukemia                                         | 16 (4.2%)            | 21 (6.3%)            |                |
| Multiple Myeloma                                 | 86 (22.4%)           | 78 (23.6%)           |                |
| Product                                          |                      |                      | <0.001         |
| axi-cel                                          | 188 (50.0%)          | 67 (20.2%)           |                |
| brexu-cel                                        | 33 (8.6%)            | 41 (12.4%)           |                |
| cilta-cel                                        | 50 (13.0%)           | 41 (12.4%)           |                |
| ide-cel                                          | 36 (9.4%)            | 37 (11.2%)           |                |
| liso-cel                                         | 42 (10.9%)           | 58 (17.5%)           |                |
| tisa-cel                                         | 35 (9.1%)            | 87 (26.2%)           |                |
| Hour of Day, median (IQR)                        | 11:00 (10:24, 12:06) | 12.24 (11:42, 13:42) | <0.001         |
| Hours After Sunrise, median (IQR)                | 4.6 (3.6, 5.6)       | 5.9 (4.8, 6.9)       | <0.001         |
| Fludarabine/Cyclophosphamide Conditioning, n (%) | 350 (91%)            | 244 (74%)            | <0.001         |
| Outpatient CAR T-cell Infusion, n (%)            | < 5 (<1.5%)          | 66 (19.9%)           | <0.001         |
| Hospital Days Before Infusion, median (IQR)      | 0.8 (0.7, 3.1)       | 0.8 (0.6, 0.9)       | <0.001         |
| LDH on Day of Infusion, IU/L, median (IQR)       | 240 (203, 325)       | 206 (169, 277)       | <0.001         |
| ECOG Performance Status, median, IQR)            | 1 (0, 1)             | 1 (1, 1)             | 0.011          |
| Van Walraven Comorbidity Score, median (IQR)     | 9 (9, 14)            | 12 (2, 19)           | >0.9           |
| SAPS-2, median (IQR)                             | 29 (28, 32)          | 27 (24, 34)          | 0.010          |
| Time Period, n (%)                               |                      |                      | 0.002          |
| 2018-2019                                        | 64 (16.7%)           | 35 (10.6%)           |                |
| 2020-2022                                        | 115 (29.9%)          | 77 (23.3%)           |                |
| 2023-2025                                        | 205 (53.4%)          | 219 (66.2%)          |                |
| Season, n (%)                                    |                      |                      | 0.3            |
| Fall                                             | 83 (21.6%)           | 79 (23.9%)           |                |
| Spring                                           | 113 (29.4%)          | 80 (24.2%)           |                |
| Summer                                           | 85 (21.8%)           | 89 (26.9%)           |                |

|                                                                                                                                                                                                                                                                                                                                               |             |             |        |
|-----------------------------------------------------------------------------------------------------------------------------------------------------------------------------------------------------------------------------------------------------------------------------------------------------------------------------------------------|-------------|-------------|--------|
| Winter                                                                                                                                                                                                                                                                                                                                        | 103 (26.8%) | 83 (25.1%)  |        |
| <b>Patient Outcomes</b>                                                                                                                                                                                                                                                                                                                       |             |             |        |
| Overall survival, 90 days                                                                                                                                                                                                                                                                                                                     | 335 (87.1%) | 292 (88.2%) | 0.7    |
| Event-free survival, 90 days                                                                                                                                                                                                                                                                                                                  | 280 (72.9%) | 254 (76.7%) | 0.2    |
| Overall survival, 365 days*                                                                                                                                                                                                                                                                                                                   | 230 (63.5%) | 169 (63.1%) | >0.9   |
| Event-free survival, 365 days*                                                                                                                                                                                                                                                                                                                | 164 (45.3%) | 126 (47.1%) | 0.7    |
| ICU admission, n (%)                                                                                                                                                                                                                                                                                                                          | 63 (16.4%)  | 43 (13.0%)  | 0.2    |
| Mechanical ventilation, n (%)                                                                                                                                                                                                                                                                                                                 | 29 (7.6%)   | 14 (4.2%)   | 0.062  |
| Vasopressors, n (%)                                                                                                                                                                                                                                                                                                                           | 46 (12.0%)  | 23 (6.9%)   | 0.023  |
| Infections, n (%)                                                                                                                                                                                                                                                                                                                             | 91 (23.7%)  | 31 (9.4%)   | <0.001 |
| CRS, n (%)                                                                                                                                                                                                                                                                                                                                    |             |             |        |
| Any CRS                                                                                                                                                                                                                                                                                                                                       | 310 (80.7%) | 252 (76.1%) | 0.014  |
| Grade 3/4 CRS                                                                                                                                                                                                                                                                                                                                 | 30 (7.8%)   | 15 (4.5%)   | 0.072  |
| ICANS, n (%)                                                                                                                                                                                                                                                                                                                                  |             |             |        |
| Any ICANS                                                                                                                                                                                                                                                                                                                                     | 172 (44.8%) | 126 (38.1%) | 0.069  |
| Grade 3/4 ICANS                                                                                                                                                                                                                                                                                                                               | 73 (19.0%)  | 59 (17.8%)  | 0.7    |
| Tocilizumab, n (%)                                                                                                                                                                                                                                                                                                                            | 242 (63.0%) | 193 (58.3%) | 0.2    |
| Anakinra, n (%)                                                                                                                                                                                                                                                                                                                               | 31 (8.1%)   | 51 (15.4%)  | 0.072  |
| *WU N = 362, OHSU N = 268 patients with at least 365 days observation time<br>IQR, interquartile range; DLBCL, diffuse large B-cell lymphoma; CAR T-cell, chimeric antigen receptor; ECOG, Eastern Cooperative Oncology Group; ICU, intensive care unit; CRS, cytokine release syndrome; ICANS, immune cell-associated neurotoxicity syndrome |             |             |        |

**Supplemental Table 2: Data co-variates, preparation and missingness handling.**

| <b>Variable</b>                               | <b>Modeling Strategy</b>                                        | Encounters with missing values, n (%) | Value Imputed                                               |
|-----------------------------------------------|-----------------------------------------------------------------|---------------------------------------|-------------------------------------------------------------|
| Age                                           | Continuous                                                      | 0                                     | NA                                                          |
| Sex                                           | Dichotomous: Male, Female                                       | 0                                     | NA                                                          |
| Race/Ethnicity                                | Dichotomous: Non-Hispanic White, All Others                     | 17 (0.02%)                            | Modal value by hospital                                     |
| Cancer Diagnosis                              | Categorical: Multiple Myeloma, Acute Leukemia, Lymphoma         | 0                                     | NA                                                          |
| Lymphodepletion regimen                       | Dichotomous: Fludarabine/Cyclophosphamide, Other                | 0                                     | NA                                                          |
| Lactate dehydrogenase                         | Continuous                                                      | 34 (4.8%)                             | Median value by hospital                                    |
| Performance status                            | Continuous                                                      | 9 (0.01%)                             | Median ECOG by hospital, malignancy, and CAR T-cell product |
| Van Walraven Score                            | Continuous                                                      | 71 (10%)                              | Median value by hospital                                    |
| SAPS-2                                        | Continuous, with age component excluded in models               | 0                                     | NA                                                          |
| CAR T-cell dose                               | Continuous standardized by malignancy, product, and body weight | 186 (26%)                             | Median dose by hospital, malignancy, and CAR T-cell product |
| Season                                        | Categorical: Spring, Summer, Fall, Winter                       | 0                                     | NA                                                          |
| Time Period                                   | Categorical: 2018-2019, 2020-2021, 2022-2024                    | 0                                     | NA                                                          |
| Days in hospital prior to CAR T-cell infusion | Continuous, defaulting to 0 for outpatient administrations      | 0                                     | NA                                                          |

**Supplemental Table 3: Adjusted odds ratios and E-values associated with one-hour shifts in CAR T-cell infusion times.**

| <b>Time Unit</b>          | <b>Outcome</b>         | <b>Avg. Adj. OR per Hour</b> | <b>95% CI</b> | <b>p Value</b> | <b>E Value</b> |
|---------------------------|------------------------|------------------------------|---------------|----------------|----------------|
| <b>Clock Time (Hrs.)</b>  | OS, 90 Day             | 0.76                         | 0.64-0.89     | <0.001         | 1.57           |
|                           | OS, 365 Day            | 0.86                         | 0.76-0.97     | 0.014          | 1.38           |
|                           | EFS, 90 Day            | 0.89                         | 0.79-1.01     | 0.068          |                |
|                           | EFS, 365 Day           | 0.87                         | 0.74-1.03     | 0.101          |                |
|                           | Grade 3-4 CRS          | 0.98                         | 0.75-1.27     | 0.869          |                |
|                           | Grade 3-4 ICANS        | 1.16                         | 1.02-1.33     | 0.029          | 1.37           |
|                           | Tocilizumab Use        | 1.02                         | 0.91-1.14     | 0.706          |                |
|                           | Anakinra Use           | 1.26                         | 1-1.57        | 0.048          | 1.49           |
|                           | Vasopressor Use        | 1.13                         | 0.93-1.36     | 0.199          |                |
|                           | Infection              | 1.16                         | 1.01-1.34     | 0.039          | 1.37           |
|                           | Mechanical Ventilation | 1.28                         | 1.03-1.58     | 0.028          | 1.51           |
|                           | ICU admission          | 1.07                         | 0.92-1.25     | 0.352          |                |
| <b>Hours Past Sunrise</b> | OS, 90 Day             | 0.76                         | 0.65-0.89     | <0.001         | 1.56           |
|                           | OS, 365 Day            | 0.85                         | 0.75-0.95     | 0.007          | 1.39           |
|                           | EFS, 90 Day            | 0.87                         | 0.77-0.98     | 0.024          | 1.35           |
|                           | EFS, 365 Day           | 0.86                         | 0.74-1.00     | 0.045          | 1.37           |
|                           | Grade 3-4 CRS          | 0.99                         | 0.77-1.27     | 0.924          |                |
|                           | Grade 3-4 ICANS        | 1.17                         | 1.02-1.33     | 0.023          | 1.37           |
|                           | Tocilizumab Use        | 1.01                         | 0.91-1.13     | 0.858          |                |
|                           | Anakinra Use           | 1.24                         | 1.03-1.48     | 0.021          | 1.46           |
|                           | Vasopressor Use        | 1.12                         | 0.93-1.34     | 0.227          |                |
|                           | Infection              | 1.17                         | 1.02-1.34     | 0.022          | 1.38           |
|                           | Mechanical Ventilation | 1.27                         | 1.03-1.57     | 0.026          | 1.51           |
|                           | ICU admission          | 1.08                         | 0.93-1.25     | 0.317          |                |

**Supplemental Table 4: Multivariable logistic regression “leave one out” sensitivity analysis, using 90-day OS as an endpoint.**

| <b>Time Unit</b>          | <b>Hour Left Out</b> | <b>n</b> | <b>Avg. Adj. OR per Hour</b> | <b>95%-CI</b> | <b>p Value</b> |
|---------------------------|----------------------|----------|------------------------------|---------------|----------------|
| <b>Clock Time (Hrs.)</b>  | 8                    | 3        | 0.76                         | 0.64-0.89     | 0.001          |
|                           | 9                    | 32       | 0.74                         | 0.62-0.88     | 0.001          |
|                           | 10                   | 183      | 0.75                         | 0.61-0.91     | 0.005          |
|                           | 11                   | 184      | 0.76                         | 0.63-0.90     | 0.003          |
|                           | 12                   | 141      | 0.75                         | 0.63-0.88     | 0.001          |
|                           | 13                   | 95       | 0.77                         | 0.64-0.91     | 0.002          |
|                           | 14                   | 41       | 0.75                         | 0.62-0.88     | 0.001          |
|                           | 15                   | 17       | 0.74                         | 0.62-0.87     | 0.001          |
|                           | 16                   | 15       | 0.83                         | 0.68-1.01     | 0.063          |
|                           | 17                   | 4        | 0.76                         | 0.64-0.90     | 0.002          |
| <b>Hours Past Sunrise</b> | 1                    | 8        | 0.77                         | 0.65-0.90     | 0.002          |
|                           | 2                    | 35       | 0.75                         | 0.63-0.88     | 0.001          |
|                           | 3                    | 128      | 0.75                         | 0.62-0.89     | 0.001          |
|                           | 4                    | 167      | 0.75                         | 0.62-0.90     | 0.002          |
|                           | 5                    | 160      | 0.73                         | 0.61-0.87     | 0.000          |
|                           | 6                    | 119      | 0.78                         | 0.66-0.92     | 0.003          |
|                           | 7                    | 47       | 0.77                         | 0.65-0.91     | 0.002          |
|                           | 8                    | 3        | 0.74                         | 0.62-0.87     | 0.000          |
|                           | 9                    | 32       | 0.76                         | 0.63-0.91     | 0.003          |
|                           | 10                   | 16       | 0.80                         | 0.66-0.96     | 0.018          |

**Supplemental Table 5: Causes of death within 90 days were generally related to malignancy or treatment complications.**

| <b>Cause of Death</b> | <b>WU, n = 34</b> | <b>OHSU, n = 35</b> |
|-----------------------|-------------------|---------------------|
| Infection             | 6                 | 6                   |
| Toxicity              | 19                | 5                   |
| Malignancy            | 4                 | 17                  |
| Other                 | 5                 | 7                   |

**Supplemental Table 6: Review of EMR-documented rationales for CAR T-cell administration after 15:00.**

| <b>Documented rationale for late infusion</b>                                               | <b>N</b> |
|---------------------------------------------------------------------------------------------|----------|
| Infection workup                                                                            | 4        |
| Hospital logistics (e.g., delays obtaining vascular access, limited clinician availability) | 12       |
| No clear reason documented                                                                  | 20       |

**Supplemental Table 7: Time-to-event sensitivity analysis varying cutoff hour between early and late groups.**

| <b>Early/Late Cutoff Hour</b> | <b>N Early</b> | <b>N Late</b> | <b>Increase in 2-Yr. RMST with Early Infusions (Days ± 95% CI)</b> | <b>p Value</b> |
|-------------------------------|----------------|---------------|--------------------------------------------------------------------|----------------|
| 12:00                         | 387            | 308           | 53.33<br>(8.97-96.33)                                              | 0.015          |
| 12:30                         | 486            | 209           | 44.31<br>(1.2-90.13)                                               | 0.056          |
| 13:00                         | 524            | 171           | 15.02<br>(33.15-60.33)                                             | 0.581          |
| 13:30                         | 583            | 112           | 48.51<br>(5.9-102.83)                                              | 0.091          |
| 14:00                         | 619            | 76            | 75.09<br>(13.13-134.65)                                            | 0.020          |
| 14:30                         | 655            | 40            | 127.07<br>(46.35-207.3)                                            | 0.003          |
| 15:00                         | 660            | 35            | 134.73<br>(49.22-221.75)                                           | 0.003          |
| 15:30                         | 672            | 23            | 157.8<br>(53.55-269.51)                                            | 0.004          |

**Supplemental Table 8: Maximal laboratory values through day 14 after CAR-T cell treatments.**

Parentheses represent 95%-CIs. P values were calculated by the  $\chi^2$  Test.

| <b>Laboratory Measurement</b>    | <b>Early CAR T-Cell Infusions (Before 15:00)</b> | <b>Late CAR T-Cell Infusions (After 15:00)</b> | <b>p-value</b> |
|----------------------------------|--------------------------------------------------|------------------------------------------------|----------------|
| C-reactive Protein, median (IQR) | 105 (52-169)                                     | 107 (59-190)                                   | 0.5            |
| Lactate Dehydrogenase            | 325 (257-459)                                    | 418 (285-724)                                  | 0.06           |
| Ferritin                         | 1155 (567-2989)                                  | 2032 (519-5963)                                | 0.13           |
| IL-6                             | 50 (7-299)                                       | 60 (4-500)                                     | > 0.9          |
| TNF-alpha                        | 2.3 (1.7-4.3)                                    | 1.9 (1.7-7.2)                                  | 0.9            |
| Interferon-gamma                 | 5 (4-18)                                         | 5 (4-30)                                       | > 0.9          |

**Supplemental Table 9: STROBE checklist.**

| Item                   | #  | Recommendation                                                                                                                                                                       | Page #               | Relevant manuscript text                                                                                                                |
|------------------------|----|--------------------------------------------------------------------------------------------------------------------------------------------------------------------------------------|----------------------|-----------------------------------------------------------------------------------------------------------------------------------------|
| Title                  | 1A | Indicate the study's design with a commonly used term in the title or the abstract                                                                                                   | 1                    | Observational cohort study                                                                                                              |
| Abstract               | 1B | Provide in the abstract an informative and balanced summary of what was done and what was found                                                                                      | 2                    | Abstract page                                                                                                                           |
| Background             | 2  | Explain the scientific background and rationale for the investigation being reported                                                                                                 | 3                    | Introduction section                                                                                                                    |
| Objectives             | 3  | State specific objectives, including any prespecified hypotheses                                                                                                                     | 3                    | ...hypothesizing that earlier administration times would correlate with better clinical outcomes and fewer or less severe complications |
| <b>Methods</b>         |    |                                                                                                                                                                                      |                      |                                                                                                                                         |
| Study Design           | 4  | Present key elements of study design early in the paper                                                                                                                              | 8                    | Retrospective cohort study                                                                                                              |
| Setting                | 5  | Describe the setting, locations, and relevant dates, including periods of recruitment, exposure, follow-up, and data collection                                                      | 8                    | Hospitals, dates, etc.                                                                                                                  |
| Participants           | 6  | Give the eligibility criteria, and the sources and methods of selection of participants. Describe methods of follow-up                                                               | 9                    | Inclusion/exclusion criteria                                                                                                            |
| Variables              | 7  | Clearly define all outcomes, exposures, predictors, potential confounders, and effect modifiers. Give diagnostic criteria, if applicable                                             | 9                    | All variables described                                                                                                                 |
| Data Sources           | 8  | For each variable of interest, give sources of data and details of methods of assessment (measurement). Describe comparability of assessment methods if there is more than one group | 9                    | Data sources, follow-up                                                                                                                 |
| Bias                   | 9  | Describe any efforts to address potential sources of bias                                                                                                                            | 10                   | Model adjustment                                                                                                                        |
| Study size             | 10 | Explain how the study size was arrived at                                                                                                                                            | 8, Supplemental 1    | Convenience sample                                                                                                                      |
| Quantitative variables | 11 | Explain how quantitative variables were handled in the analyses. If applicable, describe which groupings were chosen and why                                                         | Supplemental Table 2 | Full details in table                                                                                                                   |

|                     |     |                                                                                                                                                                                                          |                          |                                                                                                  |
|---------------------|-----|----------------------------------------------------------------------------------------------------------------------------------------------------------------------------------------------------------|--------------------------|--------------------------------------------------------------------------------------------------|
| Statistical Methods | 12A | Describe all statistical methods, including those used to control for confounding                                                                                                                        | 10-11                    | Models, comparisons                                                                              |
|                     | 12B | Describe any methods used to examine subgroups and interactions                                                                                                                                          | 11-12                    | Subgroup analyses                                                                                |
|                     | 12C | Explain how missing data were addressed                                                                                                                                                                  | 8, Supplemental Figure 1 | Imputation strategies                                                                            |
|                     | 12D | If applicable, explain how loss to follow-up was addressed                                                                                                                                               | 9                        | Study Period section                                                                             |
| <b>Results</b>      |     |                                                                                                                                                                                                          |                          |                                                                                                  |
| Participants        | 13  | Report numbers of individuals at each stage of study—eg numbers potentially eligible, examined for eligibility, confirmed eligible, included in the study, completing follow-up, and analysed            | 3, Supplemental 1        | All details reported                                                                             |
| Descriptive Data    | 14  | Give characteristics of study participants (eg demographic, clinical, social) and information on exposures and potential confounders                                                                     | 3, Supplemental Table 1  |                                                                                                  |
| Outcome Data        | 15  | Report numbers of outcome events or summary measures over time                                                                                                                                           | 3-6                      | All rates reported                                                                               |
| Main Results        | 16  | Give unadjusted estimates and, if applicable, confounder-adjusted estimates and their precision (eg, 95% confidence interval). Make clear which confounders were adjusted for and why they were included | 3-6                      | Model results give categories of confounders, rationale, and results with 95% CI                 |
| Other Analyses      | 17  | Report other analyses done                                                                                                                                                                               | 6                        | Subgroup, lab analyses                                                                           |
| <b>Discussion</b>   |     |                                                                                                                                                                                                          |                          |                                                                                                  |
| Key results         | 18  | Summarise key results with reference to study objectives                                                                                                                                                 | 6                        | First paragraph                                                                                  |
| Limitations         | 19  | Discuss limitations of the study, taking into account sources of potential bias or imprecision. Discuss both direction and magnitude of any potential bias                                               | 8-9                      | Limitations paragraph                                                                            |
| Interpretation      | 20  | Give a cautious overall interpretation of results considering objectives, limitations, multiplicity of analyses, results from similar studies, and other relevant evidence                               | 6-8                      | Full Discussion                                                                                  |
| Generalizability    | 21  | Discuss the generalisability (external validity) of the study results                                                                                                                                    | 6-9                      | Discussion of other circadian patterns in immunotherapy, discussion of population-level patterns |

|         |    |  |    |                                            |
|---------|----|--|----|--------------------------------------------|
|         |    |  |    | vs individual-level predictions            |
| Funding | 22 |  | 13 | Disclosed in the Acknowledgements section. |
